# Supplementary material for: Phase Angle Association with Dietary Habits and Metabolic Syndrome in Diabetic Hypertensive Patients: A Cross-Sectional Study
Source: MDPI journal article supplement (doi:10.3390/nu14235058), 2022-11-28
Supplement: s1 [file s1]

**Table S1. Dietary habits of the total study population regarding differences in PhA**

|                                             | Number (%) of participants |                           |                             | <i>p</i> - Value* |
|---------------------------------------------|----------------------------|---------------------------|-----------------------------|-------------------|
|                                             | Total<br>(n=208)           | Low Phase Angle<br>(n=75) | High Phase Angle<br>(n=133) |                   |
| Rapid weight changes                        | 40 (19)                    | 14 (19)                   | 26 (20)                     | 0.880             |
| Last body weight measurement                |                            |                           |                             |                   |
| Do not remember                             | 50 (24)                    | 16 (21)                   | 34 (26)                     | 0.980             |
| Yesterday                                   | 43 (21)                    | 16 (21)                   | 27 (20)                     |                   |
| One week ago                                | 58 (28)                    | 22 (29)                   | 36 (27)                     |                   |
| One month ago                               | 41 (20)                    | 15 (20)                   | 26 (20)                     |                   |
| Before more than one month                  | 16 (7.7)                   | 6 (8)                     | 10 (7.5)                    |                   |
| Received any kind of dietary recommendation | 109 (52)                   | 37 (49.3)                 | 72 (54.1)                   | 0.510             |
| Following dietary recommendations           |                            |                           |                             |                   |
| No                                          | 49 (45)                    | 18 (48)                   | 31 (43)                     | 0.780             |
| Yes                                         | 31 (28)                    | 9 (24)                    | 22 (31)                     |                   |
| Sometimes                                   | 29 (27)                    | 10 (27)                   | 19 (26)                     |                   |
| Regular stool                               | 158 (76)                   | 56 (75)                   | 102 (77)                    | 0.740             |
| Presence of nausea                          | 30 (14.4)                  | 13 (17.3)                 | 17 (12.8)                   | 0.370             |
| Loss of appetite                            | 31 (14.9)                  | 12 (16)                   | 19 (14.3)                   | 0.390             |
| Alcohol consumption                         |                            |                           |                             |                   |
| No                                          | 131 (63)                   | 54 (72)                   | 77 (58)                     | 0.090             |
| Yes                                         | 23 (11)                    | 8 (11)                    | 15 (11)                     |                   |
| Sometimes                                   | 54 (26)                    | 13 (17)                   | 41 (31)                     |                   |
| Physical activity                           | 108 (51.9)                 | 37 (49.3)                 | 71 (53.4)                   | 0.720             |
| Number of meals                             |                            |                           |                             |                   |
| 1 – 2                                       | 17 (8)                     | 5 (7)                     | 12 (9)                      | 0.830             |
| 2 – 4                                       | 162 (78)                   | 59 (79)                   | 103 (77)                    |                   |
| >4                                          | 29 (14)                    | 11 (15)                   | 18 (14)                     |                   |
| Meal preparation                            |                            |                           |                             |                   |
| Personally                                  | 64 (50)                    | 21 (53)                   | 43 (48)                     | 0.660             |
| Family member                               | 65 (50)                    | 19 (48)                   | 46 (52)                     |                   |
| Eating breakfast                            | 178 (85.6)                 | 68 (90.7)                 | 110 (82.7)                  | 0.120             |
| Eating snacks                               | 120 (57.7)                 | 41 (54.7)                 | 79 (59.4)                   | 0.510             |
| Adding salt to meals                        |                            |                           |                             |                   |
| No                                          | 57 (27)                    | 22 (29)                   | 35 (26)                     | 0.440             |
| Yes                                         | 84 (40)                    | 33 (44)                   | 51 (38)                     |                   |
| Sometimes                                   | 67 (32)                    | 20 (27)                   | 47 (35)                     |                   |
| Prescribed with ONS                         | 26 (12.6)                  | 13 (17.3)                 | 13 (9.9)                    | 0.130             |
| <b>Food Frequency Questionnaire (FFQ)</b>   |                            |                           |                             |                   |
| Red meat                                    | 2 (2 - 3)                  | 2,5 (2 - 3)               | 3 (2 - 3)                   | 0,003             |
| White meat                                  | 3 (3 - 3)                  | 2 (2 - 3)                 | 3 (3 - 3)                   | 0,02              |
| Fish                                        | 2 (2 - 2)                  | 2 (2 - 2)                 | 2 (2 - 3)                   | 0,75              |
| Deli meats                                  | 2 (1 - 3)                  | 2 (1 - 3)                 | 2 (1 - 3)                   | 0,09              |
| Eggs                                        | 2 (1 - 3)                  | 2 (1 - 3)                 | 2 (2 - 3)                   | 0,07              |
| Milk                                        | 3 (1 - 4)                  | 3 (1 - 4)                 | 3 (1 - 4)                   | 0,55              |
| Yoghurt                                     | 3 (1,25 - 4)               | 3 (1 - 4)                 | 3 (1,5 - 4)                 | 0,84              |
| Heavy cream                                 | 0 (0 - 1)                  | 0 (0 - 1)                 | 0 (0 - 1)                   | 0,71              |
| Cheese                                      | 3 (3 - 4)                  | 3 (3 - 4)                 | 3 (3 - 4)                   | 0,07              |
| Fruit                                       | 4 (3 - 4)                  | 4 (4 - 4)                 | 4 (3 - 4)                   | 0,15              |
| Vegetables                                  | 4 (3 - 4)                  | 4 (3 - 4)                 | 4 (3 - 4)                   | 0,92              |

|                                            |           |             |           |       |
|--------------------------------------------|-----------|-------------|-----------|-------|
| Dried fruit                                | 0 (0 - 1) | 0 (0 - 1)   | 0 (0 - 1) | 0,98  |
| Nuts                                       | 1 (0 - 3) | 1 (0 - 3)   | 1 (1 - 2) | 0,54  |
| Seeds                                      | 0 (0 - 1) | 0 (0 - 1)   | 0 (0 - 1) | 0,59  |
| Legumes                                    | 2 (1 - 2) | 2 (1 - 2)   | 2 (1 - 2) | 0,64  |
| Bread                                      | 4 (4 - 4) | 4 (4 - 4)   | 4 (4 - 4) | 0,62  |
| Pasta                                      | 2 (1 - 2) | 2 (1 - 2)   | 2 (1 - 2) | 0,25  |
| Cornflakes, muesli                         | 0 (0 - 0) | 0 (0 - 0)   | 0 (0 - 0) | 0,88  |
| Oat flakes                                 | 0 (0 - 1) | 0 (0 - 1)   | 0 (0 - 1) | 0,80  |
| Rice                                       | 2 (1 - 2) | 2 (1 - 2)   | 2 (1 - 2) | 0,74  |
| Other grains (quinoa, amaranth, millet...) | 0 (0 - 1) | 0 (0 - 1)   | 0 (0 - 1) | 0,40  |
| Fast food                                  | 0 (0 - 1) | 0,5 (0 - 1) | 1 (0 - 1) | 0,003 |
| Sweets                                     | 2 (1 - 3) | 1 (1 - 3)   | 2 (1 - 3) | 0,11  |

\*0- never, 1- rare, 2- once a week, 3- twice or thrice a week, 4-once a day
